# Supplementary material for: Diversity of arsenite oxidase gene and arsenotrophic bacteria in arsenic affected Bangladesh soils
Source: PubMed Central journal article supplement (PMC4792827; doi:10.1186/s13568-016-0193-0), 2016-03-15
Supplement: 13568_2016_193_MOESM1_ESM.pdf [file 13568_2016_193_MOESM1_ESM.pdf]

**Table S1: Primer sequences used for detection of bacterial 16S rRNA gene, arsenite resistance and oxidizing genes, and corresponding annealing temperature used for PCR**

| Target gene     | Primers                            | Sequences (5'→ 3')                                                                                               | Amplicon size (bp) | Annealing T (°C) | Reference                    |
|-----------------|------------------------------------|------------------------------------------------------------------------------------------------------------------|--------------------|------------------|------------------------------|
| 16S rRNA        | 27F                                | 5'AGAGTTTGATCCTGGCTCAG-3'                                                                                        | ~1400-1450         | 55               | Lane <i>et al.</i> , 1991    |
|                 | 1492R                              | 5'-GGTTACCTTGTTACGACTT-3'                                                                                        |                    |                  |                              |
| <i>aioA</i>     | AOX-F-A2                           | 5'TGC ATC GTC GGC TGY GGN TAY3'                                                                                  | 670                | 57               | Sultana <i>et al.</i> , 2012 |
|                 | AOX-R-E2<br>aoxBM1-2F<br>aoxBM3-2R | TTC GGA GTT ATA GGC CGG NCK RTT RTG<br>5'CACTTCTGCATCGTGGGNTGYGGNTA-3'<br>5'-TGTCGTTGCCCCAGATGADNCCYTTYT<br>C-3' | 1100               | 52               | QUEMENEUR ET AL.,2008        |
| <i>arsB</i>     | darsB1F                            | 5'GGTGTGGAACATCGTCTGGAAAYGCNAC-3'                                                                                | 750                | 55               | Achour <i>et al.</i> , 2007  |
|                 | darsB1R                            | 5'CAGGCCGTACACCACCAGRTACATNCC-3'                                                                                 |                    |                  |                              |
| <i>acr3P(1)</i> | dacr1F                             | 5'GCCATCGGCCTGATCGTNATGATGTAYCC3'                                                                                | 750                | 55               | Achour <i>et al.</i> , 2007  |
|                 | dacr1R                             | 5'CGGCGATGGCCAGCTCYAAYTTYTT 3'                                                                                   |                    |                  |                              |
| Topo TA         | T3                                 | 5' ATTAACCCTCACTAAAG 3'                                                                                          | Varies             | 48               |                              |
|                 | T7                                 | 5' AATACGACTCACTATAG 3'                                                                                          |                    |                  |                              |

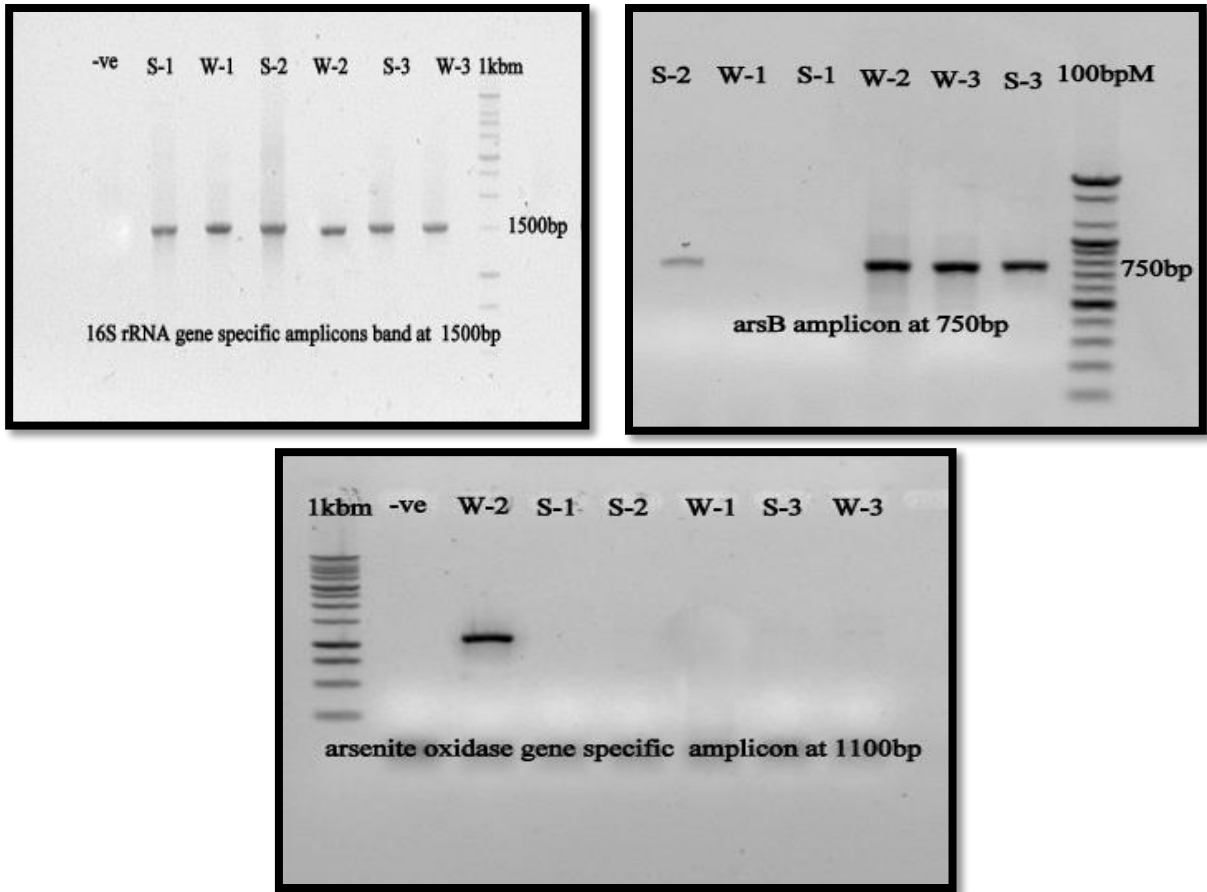

**Figure S1:PCR specific amplicon of 16S rRNA (a), arsenite resistance gene *arsB* (b) and arsenite oxidizing gene *aoxB* (c)of soil total DNA.**

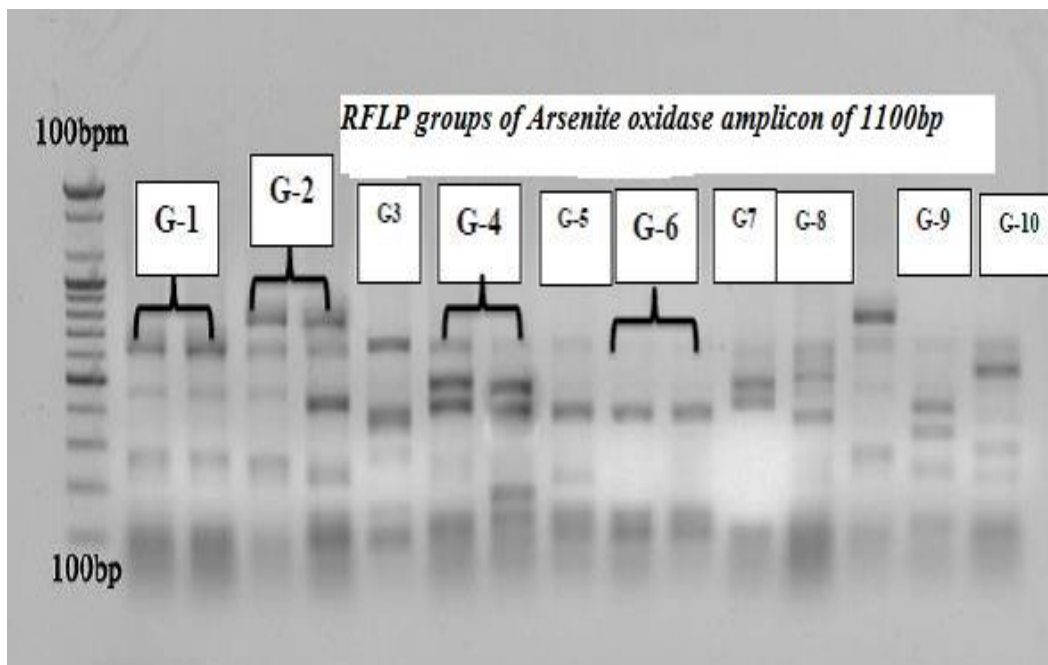

**Figure S2:** RFLP groups using *AluI* restriction digestion of *aioA* gene containing clones.

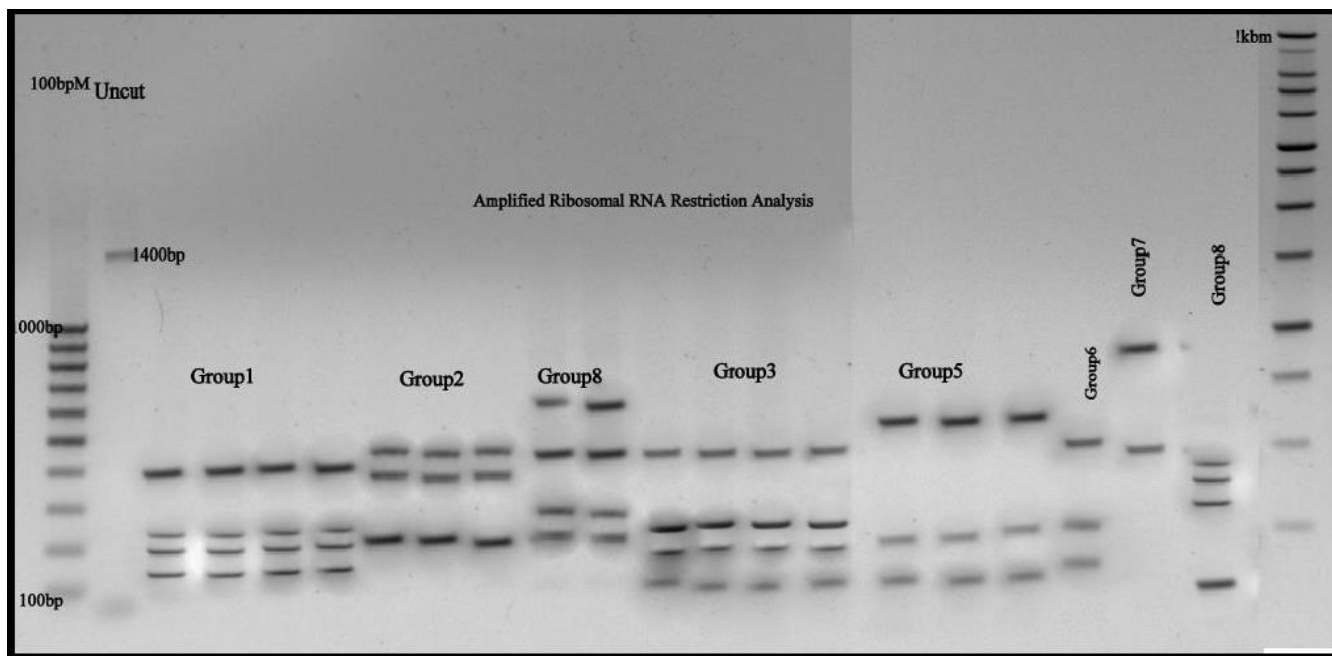

**Fig. S3:** Different fragments obtained from *AluI* enzyme digestion of the 16S rRNA gene PCR product (approx. 1400-1450 bp) of arsenite resistant isolates. Representative groups are shown here. Uncut experimental DNA incubated under same condition was used as control. Marker used was 1 kb and 100 bp

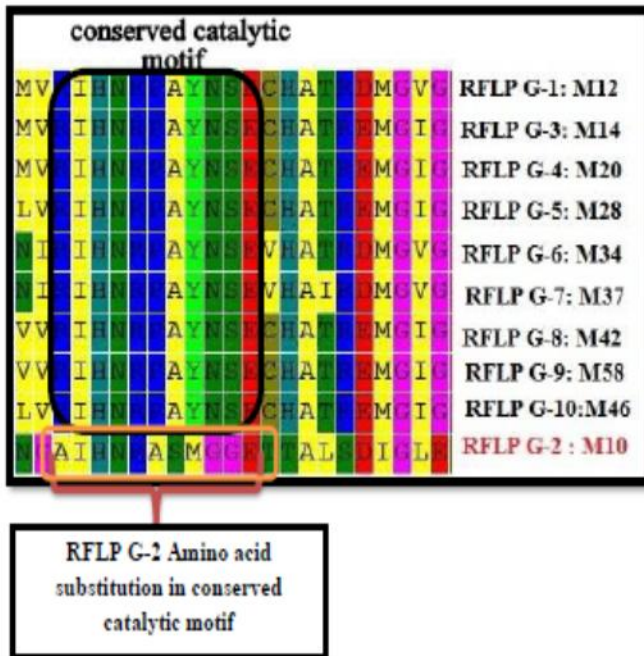

**Fig.S4: Amino acid sequence alignment (MEGA 5) of ten RFLP groups representative cloned arsenite oxidase genes from WFDSL-2 soil sample showing conserved catalytic motif.**

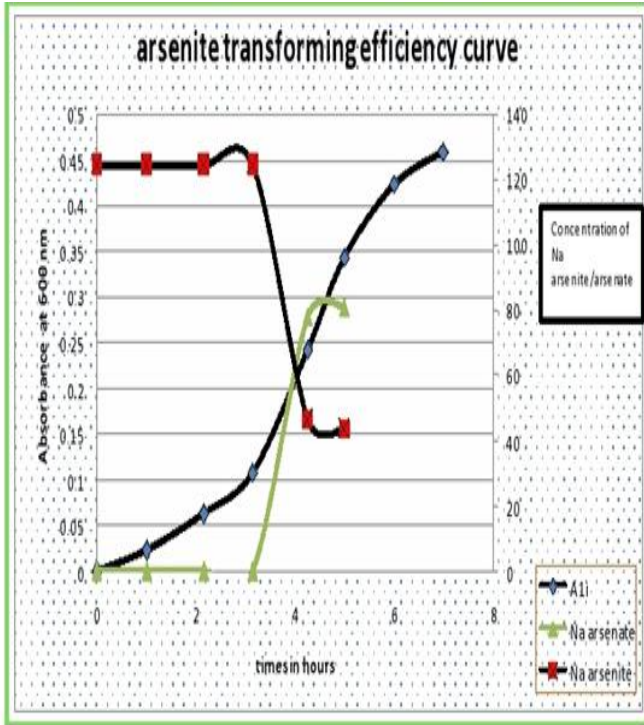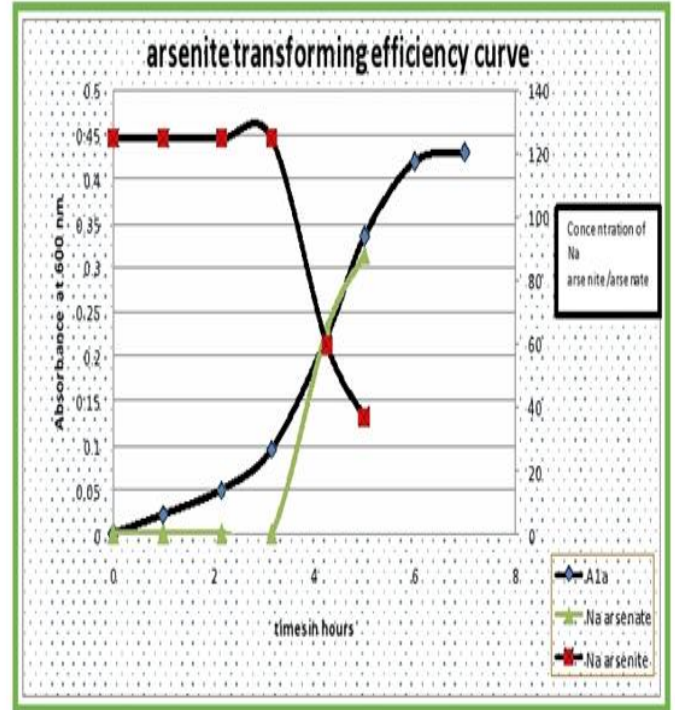

**Fig. S5: Growth kinetics and corresponding oxidation of arsenite, As (III) to arsenate, As (V) by isolate (a) A1a (b) A1i**
